# Supplementary material for: IFN-γ and IL-5 whole blood response directed against mycolactone polyketide synthase domains in patients with Mycobacterium ulcerans infection
Source: PubMed Central journal article supplement (PMC6078848; doi:10.7717/peerj.5294), 2018-07-31

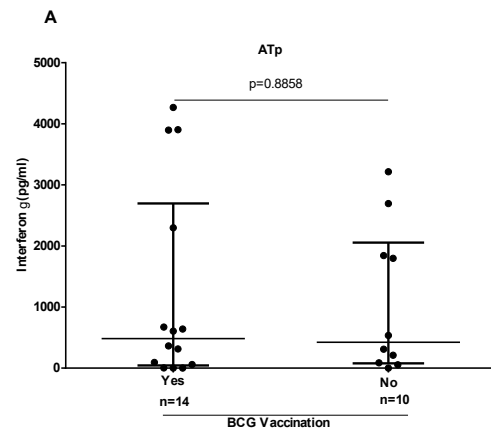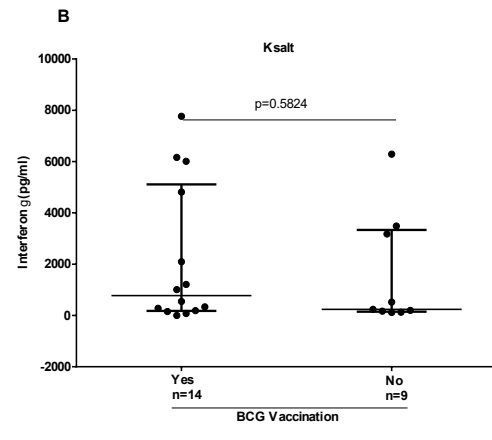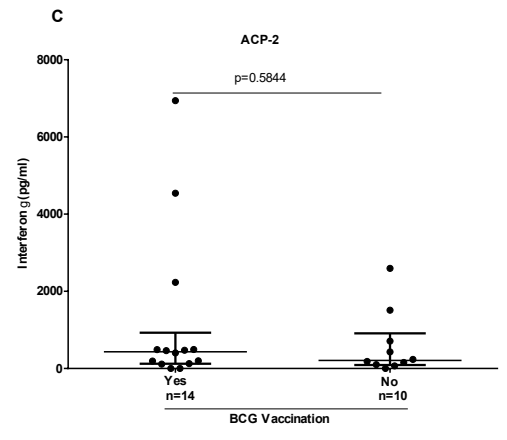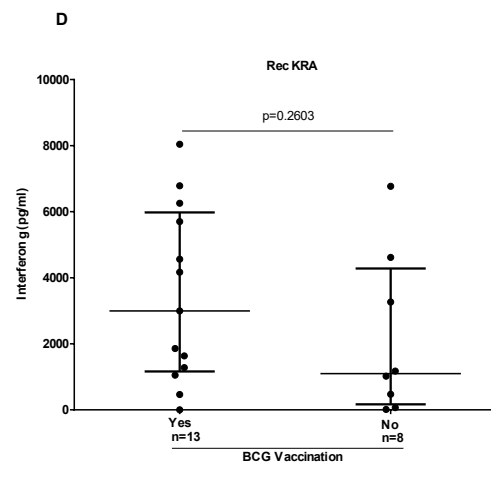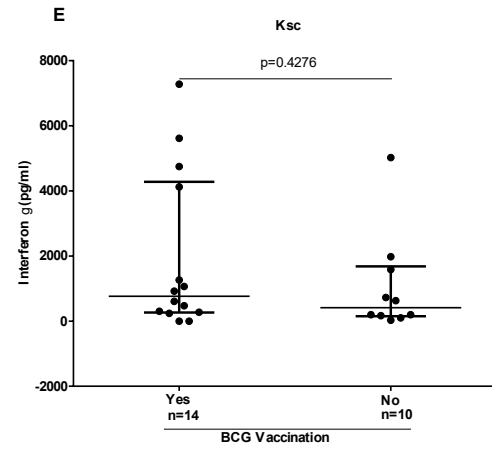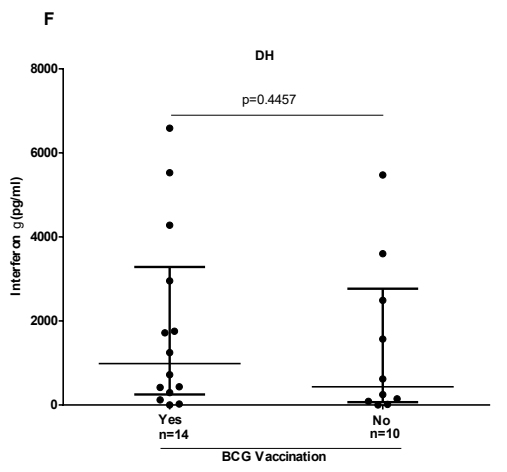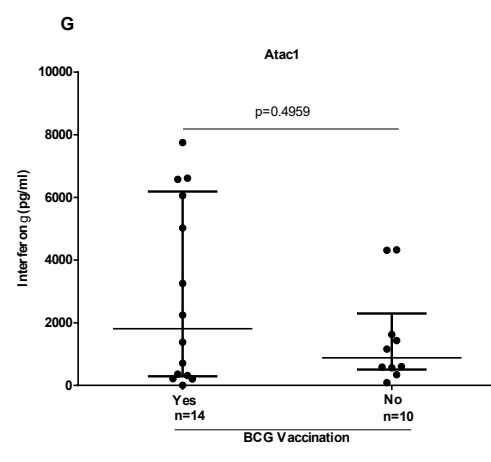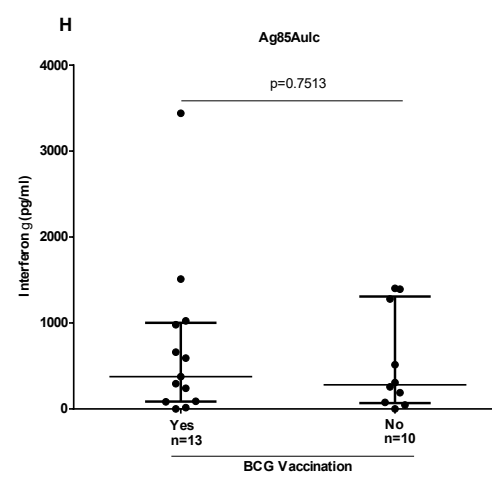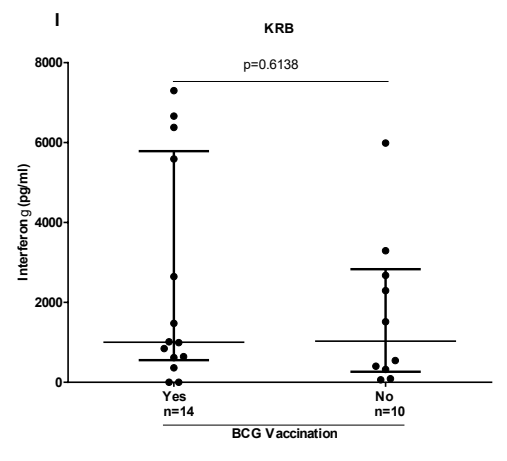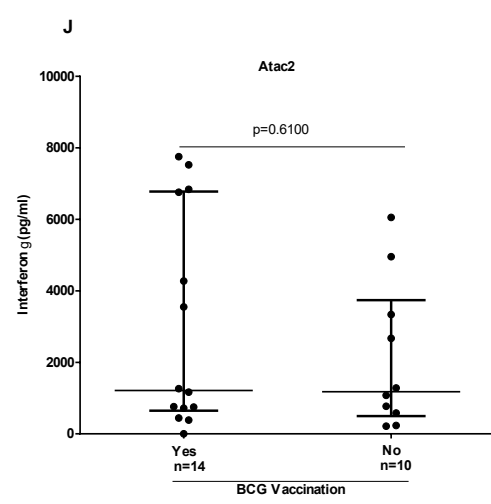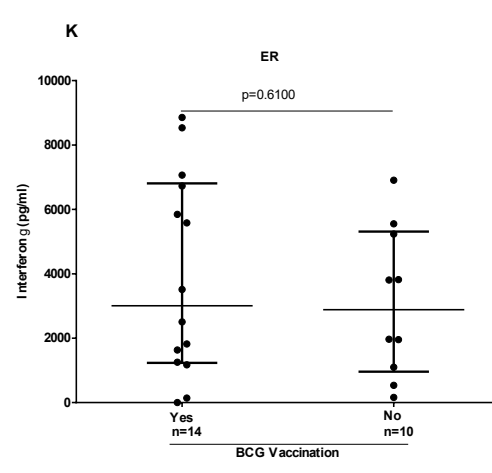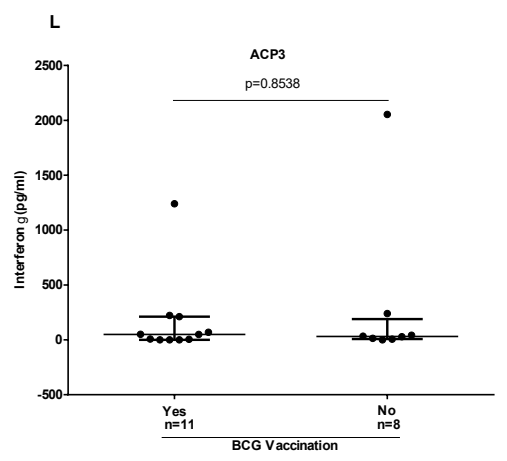

Supplement: peerj-06-5294-s003.pdf [file peerj-06-5294-s003.pdf]
