# Supplementary material for: IFN-γ and IL-5 whole blood response directed against mycolactone polyketide synthase domains in patients with Mycobacterium ulcerans infection
Source: PeerJ. 2018 Jul 31;6:e5294. doi: 10.7717/peerj.5294 (PMC6078848; doi:10.7717/peerj.5294)
Supplement: Supplemental Information 5 [file peerj-06-5294-s005.xls]

## Sheet: Data
Participants characteristics								Interferon gamma conc. Pg/ml																										Interleukine 5 conc. Pg/ml
Serial ID	Sex	Age	Group	BCG Scar	Duration of illness before seeking care(WEEKS)	Clinical form	Category	Rec ATP wk0	Rec ATP wk 8	Rec ATP wk16	Ksalt wk0	Ksalt wk8	Ksalt wk16	ACP2 wk0	ACP2 wk8	Rec KSC wk0	Rec KSC wk8	Rec DH wk0	Rec DH wk8	Atac 1 wk0	Atac1 wk8	KRB wk0	KRB wk8	Rec Atac2 wk0	Rec Atac2 wk8	Rec ER wk0	Rec ER wk8	Rec ER wk16	ACP3 wk0	ACP3 wk8	KRA wk0	KRA wk8	Ag85 u/c	Rec ATP wk0	Rec ATP wk 8	Rec ATP wk16	Ksalt wk0	Ksalt wk8	Ksalt wk16	ACP2 wk0	ACP2 wk8	Rec KSC wk0	Rec KSC wk8	Rec DH wk0	Rec DH wk8	Atac 1 wk0	Atac1 wk8	KRB wk0	KRB wk8
1	Male	8	BU patients	Yes	3	Ulcer	II	672.942	5523.32	878.13	2096.82	953.655	4675.57	472.139	4566.12	609.05	3405.91	1754.54	1397.52	3256	5414.3	846.363	4939.67	1165.82	5220.93	2507.55	5524.17	7215.67	0	3506.99	3602.84	3845.38	376.301	8.18429	6.001	191.065	40.53	11.99	0	16.3684	18.002	65.4744	6.001	40.9216	6.001	32.7373	54.01	65.425	101.99
2	Female	9	BU patients	No	1	Plaque	II	0	6161	10067.9	0	6494.62	10639.7	0	3466.25	0	288.866	0	2670.81	0	5637.24	0	25.1828	0	0	0	1128.26	11102.6	222.582	728.339	0	5030.77	15.7678	16.3691	24.002	30.3751	81.79	35.99	40.4951	81.8481	0	294.636	36.003	8.18429	36.003	0	150.012	65.488	11.992
3	Male	8	BU patients	No	4	Plaque	II	54.7645	716.388	1075.54	237.313	584.197	1817.53	155.166	686.538	196.24	1078.85	146.039	1151.34	343.661	1785.84	544.341	613.526	1283.21	4718.95	1967.34	4301.92	7978.08	50.8197	0	3062.25	3458.28	513.795	40.9214	90.009	21.195	0	5.995	5.29902	8.18439	90.005	0	36.0036	188.239	36.0036	155.502	0	57.325	9.395
4	Female	5	BU patients	Yes	12	Ulcer	I	3.67295	566.919	2232.92	277.327	558.129	4975.43	113.135	13.184	304.693	580.099	418.715	136.239	2243.08	1133.86	1476.85	6068.26	4272.68	3468.76	5846.19	4034.06	5535.97	41.7799	0	5823.39	193.369	240.84	0	0	11.183	101.7	83.34	89.433	59.0174	18.886	26.8236	8.193	10.7294	8.193	37.5531	286.227	42.917	11.137
5	Female	33	BU patients	No	2	Ulcer	I	310.142	836.547	2098.58	168.752	3858.57	2988.04	430.132	246.105	27.366	24.5008	0	0	583.792		402.442	5870.19	770.792	6322.22	1099.16	6560.34	6721.93	0	0	738.872	2503.98	45.609	0	50.778	89.4735	17.16	58.45	74.2835	34.286	58.449	37.297	125.114	37.297	125.114	94.2274	60.014	62.857	78.454
6	Female	6.5	BU patients	Yes	2	Plaque	I	3903.25	359.909	11066.3	6009.31	8172.71	482.066	4541.99	6583.57	5616.83	1406.31	5528.63	4117.18	6614.91	1957.89	6380.29	4761.77	7526.47	6145.27	8855.36	6507.18	666.385	13.4804	0	5918.57	966.839	979.262	79.3494	39.55	190.038	29.77	86.81	184.448	9.9184	102.82	19.8373	87.01	19.8373	87.01	32.973	47.46	29.759	55.81
7	Male	13	BU patients	Yes	3	Ulcer	II	2297.65	168.639	1722.23	4813.73	89.463	2539.1	2232.66	111.632	4122.04	8100.73	2952.85	9086.33	6062.48	8776.25	5588.98	9479.46	6758.81	9595.74	6726.32	2391.91	1654.16	1240.2	0	5681.82	8765.18	1403.38	55.356	7.91	103.758	46.51	15.36	143.638	83.033	79.1	27.678	102.83	36.094	102.83	36.904	15.82	40.913	0.36
8	Male	37	BU patients	No	2	Nodule	I	1842.96	680.545	1679	3486.3	784.645	203.835	2232.66	504.925	1977.58	108.465	3602.36	288.987	4312.61	1359.45	3292.07	2328.57	4954.49	1530.47	3819.89	5910.84	7250.05	211.697	0	8797.21	1977.02	1024.51	0	138.097	11.183	0	35.27	67.073	64.581	80.958	9.226	22.221	9.226	22.221	89.2684	73.608	73.831	14.768
9	Female	7	BU patients	Yes	8	Ulcer	II	93.4347	237.697	61.26	334.835	1531.34	136.14	2232.66	536.606	274.485	1190	121.295	2681.03	358.045	530.976	363.975	2261.13	444.855	899.297	1819.86	2192.86	7345.01	28.7836	71.3477	1732.15	3161.23	256.127	39.6746	34.9	45.5607	34.73	58.17	70.8707	74.3954	47.3	19.8373	0	19.8373	0	10.4158	16.851	107.93	16.87
10	Female	38	BU patients	No	3	Ulcer	I	86.3783	2687.09	70.892	521.242	3599.23	1786.48	2232.66	2779.92	166.258	600.308	85.3758	894.317	89.8693	717.912	62.9085	850.216	215.686	1658.74	161.765	5903.79	63.803	7.46257	0	22.4673		660.54	35.0317	26.824	841.199	14.96	5.412	971.699	5.0048	139.482	30.0271	21.4593	25.0226	21.4593	25.0227	10.73	15.014	43.812
11	Male	15	BU patients	Yes	3	Plaque	II	3895.82	912.14	8429.06	6160.54	2574.98	6997.05	2232.66	3277.24	4749.62	3526.58	6587.42	5314.53	6578.42	5907.83	6663.82	5673.74	6839.02	4967.44	7063.72	5928.91	8854.42	33.5481	7.17279	7409.72	5443.69	3439.81	60.0548	80.205	39.1287	140	85.19	16.7677	100.095	69.505	130.118	149.715	70.0638	149.715	35.0321	58.815	245.25	48.185
12	Male	20	BU patients	Yes	20	Ulcer	II	4268.79	209.873	9442.82	7764.26	314.809	9740.57	2232.66	165.477	7276.99	3402.36	4280.39	6371.89	7753.18	8105.96	7299.14	10745.2	7753.18	12355.4	8533.91	4397.3	10506.2	5.2075	0	7841.77	5392.12	75.6899	85.0771	140.612	1070.96	0	151.5	987.058	125.113	178.042	90.0811	119.222	80.0721	119.222	0	167.342	236.82	103.51
13	Male	46	BU patients	No	10	Ulcer	II	212.145	2339.86	319.01	126.861	5451.46	269.39	2232.66	3187.59	199.352	302.701	246.258	1428.75	600.188	2353	323.014	729.072	583.131	2024.86	1956.21	6514.79	7089.2	49.2826	0	630.037	3002.8	293.165	0	9.7565	19.3425	114.4	44.19	19.3425	0	38.328	0	26.8994	10.7294	26.8994	4.9593	69.505	10.734	57.428
14	Male	10	BU patients	Yes	8	Ulcer	II	314.486	823.929	191.408	544.753	788.318	4622.16	2232.66	268.405	1265.4	3903.01	1717.41	5549.46	5022.18	3966.71	2647.01	5466.16	3551.02	5872.87	5580.79	2892.3	10740.1	2053.93	149.494	2139.57	6828.4	0	14.878	114.286	55.8901	14.13	68.43	39.1201	74.3874	5.715	0	51.428	24.7966	51.428	8.9106	68.568	14.017	53.466
15	Male	10	BU patients	Yes	1	Plaque	II	2695.02	1755.06	9641.31	3179.35	6368.67	11229.3	2232.66	1582.47	725.868	507.513	2491.08	1229.6	1430.33	726.04	2296.74	1625.48	2673.27	1676.15	3806.89	37.5805	10406.9	239.205	0	2454.64	2415.72	1511.31	18.8654		22.3567	22.45	53.47	0	23.5816	5.347	4.7163	64.162	58.9086	64.162	8.974	26.734	53.355	0
16	Female	20	BU patients	No	2	Nodule	I	640.846	138.913	545.873	150.959	88.3994	3076.71	2232.66	395.693	920.203	2740.08	1248.14	0	709.673	3809.29	993.079	6393.92	1264.34	5627.79	1632.77	4228.29	10187.2	68.9923	298.569	1709.69	6132.93	89.9803	0	53.469	5.58957	0.028	12.64	11.1816	13.462	12.638	35.898	0	8.974	0	179.488	20.501	26.923	58.711
17	Female	23	BU patients	Yes	16	Ulcer	III	605.485	102.318	1409.1	1211.43	3464.87	7310.98	2232.66	1320.9	1066.73	909.252	433.65	2037.4	316.079	186.354	619.051	221.945	718.534	172.117	1170.73	6693.1	8774.57	0	93.816	1120.99		1393.9	13.462	12.638	294.9	0	0	212.71	31.411	43.442	17.949	0	17.949	0	8.975	34.753	65.928	62.442
18	Female	13	BU patients	Yes	2	Ulcer	I	1798.76	4685.17	9959.02	6289.6	6457.37	10122.3	2232.66	5236.62	1582.94	1357.55	1569.04	1101.01	1624.65	1425.75	2677.32	1429.31	3337.25	2212.74	5552.52	1732	9523.32	6.11413	97.4748	4454.68		189.464	4.487	56.479	58.0114	17.37	116.9	58.0114	22.436	62.41	0	58.198	112.177	58.198	8.688	58.198	13.467	148.5
19	Male	16	BU patients	No	2	Plaque	I	3214.66	0	1233.52	76.7948	36.937	3658.03	2232.66	154.452	5023.45	6284.78	5475.65	6078.82	4327.06	3333.92	5986.63	6735.2	6054.46	6693.1	6904.59	521.239	8911.09	0		6995.03		0	8.688	45.559	39.1294	0	0	61.4794	0	45.7058	26.065	26.066	21.721	26.066	0	51.4158	26.069	26.035
20	Male	56	BU patients	No	16	Nodule	I	0	8.44866	367.591	189.808	115.28	211.025	2232.66	58.3033	0		22.955	250.418	203.477	236.182	0	122.289	383.382	193.472	140.989	9063.73	4955.67		182.94	200.31		82.428	4.62	0	24.1746	41.52	8.735	43.5146	0	13.033	0	58.979	0	58.979	32.314	21.721	0	21.098
21	Male	6	BU patients	Yes	3	Nodule	I	58.672	6659.4	1396.58	116.061	1949.61	1970.8	2232.66	819.27	239.548	108.158	293.818	44.0591	214.188	225.673	643.098	136.646	750.468	585.338	1254.76	8296.45	3331.93		125.963	2687.96		1279.67	27.698	26.066	178.878	40.13	54.77	43.5079	36.93	67.404	13.849	5.19022	13.849	5.19022	0	20.7613	23.082	15.908
22	Male	6	BU patients	Yes	12	Plaque	III	0	4253.05	7801.1	200.59	7359.53	10701	2232.66	5552.21	102.318	61.8644	15.2764	79.6696	560.432	229.234	88.5746	197.184	235.171	190.062	537.526		10619.3		1.32658	1678.23		307.365	0	58.979	59.7802	16.22	10.39	14.5002	25.3105	25.9511	25.3105	5.15629	20.2487	5.15629	0	40.9581	20.249	42.575
23	Female	70	BU patients	No	20	Ulcer	III	535.15		537.771	1009.49	2847.36	3948.2	2232.66	4974.89	627.688	1203.84	620.57		1161.56	1856.44	1517.47	2418.31	1076.14	4979.13	5233.22		10986.9			3275.69		591.585	0	10.3804	19.3402	0	58.57	19.34	0	89.5554	0	44.8686	0	44.8686	51.4149	138.385	10.601	0
24	Female	9	BU patients	No	4	Ulcer	II	363.635		6995.25			6981.35	2232.66		472.183	7696.03	721.842	8390.73	1378.55	7392.1	1014.92	9090.87	759.834	8852.06	3511.51		6272.56		0	3012.2			11.34	85.1589	39.1216			27.9416	28.5636	143.93	0		22.8511			134.61	39.96
25	Male	17	Endemic Control					990.804			6573			2232.66		3459.5	3596.34	4922.94	4518.99	5957.94	4101.09	6174.27	5360.24	6441.5	6272.04	7395.91			19.4341	133.67				100.446	144.577		195.601			195.601		100.446		0		0		37.011
26	Male	16	Endemic Control					872.034			1306.22			2232.66		200.32		899.306		0		2553.24		2202.1		3468.8			115.002					0			52.87			36.96		37.006		137.452		0		0
27	Female	28	Endemic Control					929.802			1245.83			2232.66		845.43		2025.76		2377.43		8635.43		2869.83		6792.43			568.892					59.5115			83.455			68.925		112.425		119.675		105.225		141.395
28	Female	13	Endemic Control					110.293			301.267			2232.66		226.86		191.996		285.057		407.457		512.337		4515.93			629.782					208.529			208.529			251.969		280.959		346.149		382.369		143.339
29	Male	17	Endemic Control					3298.16			4824.11			2232.66		4509.1		4709.25		2842.02		3511.47		4696.13		961.007			137.357					119.543			97.813			97.843		134.033		141.273		206.443		140.583
30	Male	16	Endemic Control					2645.12			4610.81			2232.66		3416.3		3552.22		1191.37		4154.66		3557.41		4847.08			0					102.429			514.659			250.869		135.409		267.319		267.369		127.159
31	Female	18	Endemic Control					792.211			430.252			2232.66		669.27		1645.89		1145.26		1989.48		3663.11		4620.65			0					101.236			158.946			51.776		84.746		68.256		142.436		76.506
32	Female	10	Endemic Control					1506.64			1349.65			2232.66		348.43		2493.05		2744.83		2273.85		3337.27		3917.86			0					115.424			189.624			131.954		57.714		32.974		111.254		175.884
33	Female	10	Endemic Control					1077.13			552.819			2232.66		259.56		2667.82		4899.88		4940.18		4900.18		4193.34			107529					21.705			37.983			72.491		54.261		5.426		27.131		16.278
34	Male	10	Endemic Control					3491.88			4769.88			2232.66		4766.9		4389.88		204.331		4266.66		4827.44		5180.88			50.069					40.822			46.249			62.525		51.675		40.822		56.595		42.448
35	Female	8	Endemic Control					0			3235.22			2232.66		3435.5		4159.85		1449.4		5328.14		5024.38		5024.38			568.171					4.7161			174.288			23.582		28.318		33.0142		14.148		14.149
36	Female	10	Endemic Control					4016.31			4035.4			2232.66		5087.8		5067.78		1751.26		5558.16		5344.25		4920.91			57.4592					14.1488			14.149			4.719		186.799		0		51.879		33.014
37	Male	10	Endemic Control					3339.28			0			2232.66		5503.8		5579.91		0		0		0		5797.45			0					0			29.007			29.007		53.179		29.007		87.02		0
38	Female	10	Endemic Control					0			13236.5			2232.66		0		0		13255.5		12121.7		14475.1		0			0					29.432			24.527			39.243		44.148		53.959		58.864		161.876
39	Female	9	Endemic Control					12741			4646.56			2232.66		12646		12274.1		4255.55		4338.49		4258.51		12626.7			2165.09					0			15.707			7.854		23.56		0		19.634		0
40	Female	58	Endemic Control					4682.1			7577.61			2232.66		4430.3		4483.64		4561.4		7734.55		7690.96		4255.55			3814.18					43.06			58.246			68.371		53.184		48.122		58.246		63.308
41	Male	22	Endemic Control					0.97189			3639.4			2232.66		2412.4		7472.99		8272.28		747.635		20.7349		7359.64			2961.01					132.444			34.338			9.811		0		9.811		83.391		63.77
42	Male	34	Endemic Control					5273.4			1512.66			2232.66		6956.9		5031.4		8353.21		5194		1139.27		6185.74			85.0947					31.135			15.568			114.159		102.355		31.135		62.366		90.929
43	Male	48	Endemic Control					104.27			7624.7			2232.66		8353.2		74.5774		11396.4		358.777		3188.05		5671.4			155.508					103.781			228.317			140.104		60.441		202.372		68.295		114.159
44	Male	15	Endemic Control					6488.16			8484.76			2232.66		10974		6929.31		227.015		5962.18		6668.52		2021.56			0					20.757			67.458			31.135		0		41.513		51.891		27.313
45	Female	30	Endemic Control					7999.08			10987.4			2232.66		0		7300.92		7293.86		7614.58		8262.16		3599.51			70.3356					66.753			123.443			19.634		131.763		15.707		94.28		23.56
46	Male	13	Endemic Control					8312.75			11870.8			2232.66		4532.9		8499.94		8985.56		8221.68		11359.4		6643.23			1047.8					0			7.854			74.607		0		0		18.682		7.854
47	Female	29	Endemic Control					11276			6728.86			2232.66		10805		11507.1		7529.66		11566.4		11626.6		7371.74			1159.1					47.452			0			14.236		147.099		37.962		80.669		80.669
48	Female	28	Endemic Control					11819			11537.7			2232.66		6941.1		11922.6		5981.8		5904.58		6162.86		11048.4			0					19.49			28.981			5.255		52.707		10		52.707		28.981
49	Female	27	Endemic Control					8034.86			7516.58			2232.66		6593.6		7716.46		2752.95		7733		7575.07		10878.9			34.5549					0			0			0		0		0		4.506		0
50	Male	15	Endemic Control					14839.2			4411.83			2232.66		6168.3		10901.1				7534.02		7577.61		8523			33.8639					31.319			57.421			57.421		67.861		41.759		36.539		41.759
51	Female	13	Endemic Control					7490.43			5014.55			2232.66				0				6451.19		7302.97		7322.61			1450.18					20.874			37.573			45.923		12.525		50.098		12.525		12.525
52	Female	23	Endemic Control					4660.83			1525.88			2232.66				4300.83				7246.93		7281.83		7573.25			0					19.622			4.906			44.148		24.527		63.77		53.959		19.622
53	Male	48	Endemic Control					4846.7			8520.28			2232.66				4717.82				4636.9		4924.63		7281.17			0.97189					68.394			79.793			39.897		56.995		34.197		45.596		51.296
54	Male	27	Endemic Control					62.978			10538.5			2232.66				1336.88				1106.78		2280.88		7294.83			608.441					24.321			24.321			48.64		37.973		24.321		57.435		16.214
55	Female	22	Non-endemic					127.033			137.033			2232.66		202.92		0		56.2048		0		0		46.0865			0					0			0			9.49		14.235		67.213		26.083		6.619
56	Female	21	Non-endemic					4547			4456.41			2232.66		4465.5		4420.17		4562.1		4459.43		4471.51		4232.94			86.6764					4.553			0			15.058		30.815		15.058		25.563		0
57	Male	25	Non-endemic					0			0			2232.66		0		0		0		0		0		0			0					0			0			0		0		26.263		5.253		10.505
58	Female	22	Non-endemic					70.71			4.94572			2232.66		100.21		0		64.81		159.08		23.57		0			23.57					175.641			20.209			0		5.323		15.968		5.323		0
59	Male	31	Non-endemic					0			0			2232.66		65.343		50.1339		0		0		29.7513		0			0					0			0			0		28.973		0		3.601		0
60	Male	25	Non-endemic					0			0			2232.66		0.3807		0		47.517		0.3807		85.0947		0			0.3807					0			4.583			0		0		24.597		4.583		0
61	Male	22	Non-endemic					0			0			2232.66		0		0		0		0		0		0			0					0			144.367			101.587		0		37.427		924.997		0
62	Male	19	Non-endemic					0			0			2232.66		0		83.4819		0		0		0		0			0					0			5.541			0		22.639		0		39.738		11.24
63	Female	26	Non-endemic					0			0.092771			2232.66		83.482		0		54.477		0		0		0.092771			0					0			0			10.645		0		111.772		74.515		5.323
64	Female	25	Non-endemic					94.3587			0			2232.66		0		333.896		3.71839		0		0		0			0					4.506			15.66			10.44		5.22		57.418		516.966		16.818
65	Male	31	Non-endemic					0			0			2232.66		0		73.461		0		33.905		0		106.945			0								243.316			13.518		0		27.036		27.036		18.024
[truncated: 10 more columns]
